1 **An integrated comparative physiology and molecular approach pinpoints mediators of**  
2 **breath-hold capacity in dolphins**

3  
4 Ashley M. Blawas<sup>1</sup>, Kathryn E. Ware<sup>2</sup>, Emma Schmaltz<sup>1</sup>, Jake Spruance<sup>2</sup>, Austin S. Allen<sup>1</sup>,  
5 Nicole West<sup>3</sup>, Nicolas Devos<sup>4</sup>, David L. Corcoran<sup>4</sup>, Douglas P. Nowacek<sup>1,5</sup>, William C. Eward<sup>6,7</sup>,  
6 Andreas Fahlman<sup>8,9</sup>, and Jason A. Somarelli<sup>2,7</sup>

7  
8 <sup>1</sup>Nicholas School of the Environment, Duke University Marine Laboratory, Beaufort, NC,  
9 28516, USA.

10  
11 <sup>2</sup>Department of Medicine, Duke University Medical Center, Durham, NC, 27710, USA.

12  
13 <sup>3</sup>Dolphin Quest, Oahu, 5000 Kahala Ave, Honolulu, HI, 96816, USA.

14  
15 <sup>4</sup>Duke Center for Genomic and Computational Biology, Duke University, Durham, NC, 27708,  
16 USA.

17  
18 <sup>5</sup>Pratt School of Engineering, Duke University, Durham, NC, 27708, USA.

19  
20 <sup>6</sup>Department of Orthopaedic Surgery, Duke University Medical Center, Durham, NC, 27710,  
21 USA.

22  
23 <sup>7</sup>Duke University Medical Center, Duke Cancer Institute, Durham, NC, 27710, USA.

24  
25 <sup>8</sup>Global Diving Research, Inc., Ottawa, ON, K2J 5E8, Canada.

26  
27 <sup>9</sup>Research Department, Fundació Oceanogràfic de la Comunitat Valenciana, Gran Vía Marqués  
28 del Turia 19, 46005 Valencia, Spain.

29  
30 Address correspondence to: [jason.somarelli@duke.edu](mailto:jason.somarelli@duke.edu); [andreas.fahlman@duke.edu](mailto:andreas.fahlman@duke.edu)

31

32 **Key words:** ischemic stress tolerance; cetaceans; diving physiology; oceans and human health

33 **Abstract**

34 Ischemic events, such as ischemic heart disease and ischemic stroke, are the number one cause of  
35 death globally. Ischemia prevents blood, carrying essential nutrients and oxygen, from reaching  
36 the tissues leading to cell death, tissue death, and eventual organ failure. While humans are  
37 relatively intolerant to these ischemic events, other species, such as marine mammals, have  
38 evolved remarkable tolerance to chronic ischemia/reperfusion during diving. Here we capitalized  
39 on the unique adaptations of bottlenose dolphins (*Tursiops truncatus*) as a comparative model of  
40 ischemic stress and hypoxia tolerance to identify molecular features associated with breath-  
41 holding. Using RNA-Seq we observed time-dependent upregulation of the arachidonate 5-  
42 lipoxygenase (ALOX5) gene during breath-holding. Consistent with the RNA-Seq data, we also  
43 observed increased ALOX5 enzymatic activity in the serum of dolphins undergoing breath-  
44 holds. ALOX5 has previously been shown to be activated during hypoxia in rodent models, and  
45 its metabolites, leukotrienes, induce vasoconstriction. The upregulation of ALOX5 occurred  
46 within the estimated aerobic dive limit of the species, suggesting that ALOX5 enzymatic activity  
47 may promote tolerance to ischemic stress through sustained vasoconstriction in dolphins during  
48 diving. These observations pinpoint a potential molecular mechanism by which dolphins, and  
49 perhaps other marine mammals, have adapted to the prolonged breath-holds associated with  
50 diving.

51

52 **Introduction**

53 Ischemic stress and hypoxia are associated with negative clinical outcomes in humans.

54 Maintenance of homeostatic function in mammalian tissues is directly dependent on a continuous  
55 supply of oxygenated blood. Interruption of this blood supply, known as ischemia, results in a  
56 reduction in local oxygenation compared to normal physiologic levels, or hypoxia, and can lead  
57 to inflammation and cell/tissue death (Bona et al., 1999; Choi, 1996; Eltzschig and Carmeliet,  
58 2011; Gottlieb and Engler, 1999; Murdoch et al., 2005). Ischemia is the causative factor in  
59 multiple clinical settings and ischemic heart disease is the number one cause of death globally,  
60 accounting for over 9 million deaths each year (Nowbar et al., 2019; World Health Organization,  
61 2018).

62 Marine mammals have evolved tolerance to ischemic stress. While humans have little tolerance  
63 for ischemic stress and hypoxia, a number of species have evolved unique physiologies that  
64 allow them to seemingly thrive despite regular tissue-level ischemia and low-oxygen  
65 environments. One group of animals that undergo repeated daily ischemic events is marine  
66 mammals. During a dive, a marine mammal experiences a suite of cardiovascular changes that  
67 aid in reducing aerobic metabolism (Irving et al., 1941; Scholander, 1940). As part of this  
68 response, both heart rate ( $f_H$ ) and stroke volume decrease, resulting in reduced cardiac output  
69 (Fahlman et al., 2019b, 2020). Increased peripheral resistance, through selective  
70 vasoconstriction, helps assure that mean arterial blood pressure is maintained, at least in studies  
71 on forced diving in seals (Blix et al., 1976; Zapol et al., 1979). Ultimately, this response  
72 conserves oxygen in the blood and lungs for oxygen-sensitive tissues like the brain and the heart,

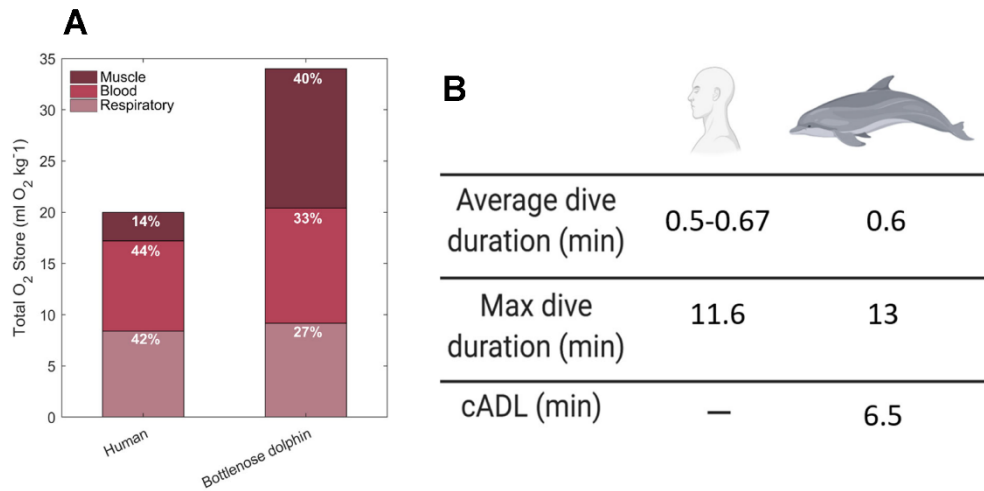

**Figure 1. Dolphins as a model of ischemia.** **A.** Dolphins and other cetaceans have increased oxygen stores that are reapporportioned compared to humans. Oxygen store data were reported in Ponganis et al., 2011 (human) and Kooyman and Ponganis, 2018 (dolphin). **B.** The enhanced oxygen stores and diving capacity of dolphins makes them a unique model to study ischemic stress tolerance. Dive data and calculated aerobic dive limit (cADL) were reported by AIDA and Foster and Sheel, 2005 (human) and Fahlman et al., 2018 (dolphin).

73 while the skeletal muscles rely on endogenous myoglobin-bound oxygen for aerobic metabolism  
74 (Davis and Kanatous, 1999; Fahlman et al., 2009). While these responses to submersion in water  
75 are largely conserved across all vertebrates, many of the physiological adaptations that support  
76 diving are exaggerated in marine mammals compared to other taxa (Kooyman and Ponganis,  
77 1998; Panneton, 2013) (**Figure 1**). For example, maintenance of increased peripheral resistance  
78 does not appear to occur in human breath-hold divers, as mean arterial blood pressure increases  
79 with dive duration (Breskovic et al., 2011; Gooden, 1994; Taboni et al., 2019). These  
80 physiological differences highlight the tremendous potential to study marine mammals as model  
81 organisms for the investigation of adaptations to ischemic and hypoxic stress tolerance, and the  
82 cardiorespiratory plasticity that helps prevent hypertension (Blawas et al., 2021; Fahlman et al.,  
83 2019b, 2020b).

84 Marine mammals have evolved molecular adaptations to ischemic stress tolerance. Increasing  
85 attention has been paid to the defenses marine mammals possess against the oxidant by-products  
86 and inflammation associated with ischemic, hypoxia, and reperfusion at the molecular level  
87 (Allen and Vázquez-Medina, 2019; Hindle, 2020; Zhu et al., 2018). Using phylogenetic and  
88 evolutionary convergence approaches, several gene families have been identified to contribute to  
89 the increased ischemic stress tolerance of marine mammals including hypoxia-inducible factor 1  
90 (HIF-1) (Bi et al., 2015; Johnson et al., 2005, 2004), genes relating to the glutathione system and  
91 peroxiredoxins (Bagchi et al., 2018; Tift et al., 2014; Yim et al., 2014; Zhou et al., 2018), and  
92 several genes linked to oxygen storage, particularly hemoglobin and myoglobin (Mirceta et al.,  
93 2013; Nery et al., 2013; Tian et al., 2017, 2016). Yet, few studies have examined differential  
94 gene expression in marine mammals under conditions of ischemia and hypoxia (i.e. diving  
95 conditions).

96       Here, we investigate the dynamic molecular changes that occur during an apnea in  
97 bottlenose dolphins using genomic analysis of peripheral blood mononuclear cells (PBMCs) and  
98 serum sampled at regular intervals during breath-holds. We couple these analyses with  
99 previously-published  $f_H$  measurements from the same dolphins to understand how the timing of  
100 molecular changes relates to the physiologic dive response (Blawas et al., 2021; Fahlman et al.,  
101 2019b, 2020b). Our integrated analyses pinpoint a gene regulatory network centered around the  
102 arachidonate 5-lipoxygenase (ALOX5) gene and its downstream metabolites, leukotrienes, as  
103 differentially activated during breath-holding. This activation of ALOX5 is consistent with  
104 cardiovascular control through a reduction in  $f_H$  and peripheral vasoconstriction to efficiently  
105 manage oxygen use during diving. Based on our collective results we propose a model in which

106 the ALOX5 pathway is upregulated during extended breath-holds as a mechanism to sustain  
107 vasoconstriction and maintain oxygen stores for critical organs in dolphins while diving.

108

## 109 **Materials & Methods**

110 Data collection and animal information. Four adult male bottlenose dolphins (*Tursiops*  
111 *truncatus*) housed at Dolphin Quest Oahu (Honolulu, HI, USA) with an average ( $\pm$  S.D.) age of  
112  $22.8\pm 9.9$  years (range = 11 – 35 years) and body mass of  $198.1\pm 42.9$  kg (range = 147.0 – 251.7  
113 kg, **Table 1**) participated in this study. All data were collected under voluntary participation and  
114 the animals could end a trial at any time. Routine veterinary assessments include venous blood  
115 sampling, and the dolphins that participated in this study had previously been desensitized to the  
116 blood sampling protocol. The study protocols were accepted by Dolphin Quest and the Animal  
117 Care and Welfare Committee at the Oceanogràfic (OCE-17-16, amendments OCE-29-18 and  
118 OCE-3-19i).

**Table 1.** Animal ID, age (years), body mass (kg), and included analyses for all dolphins in the study.

| Animal ID       | Age (years)    | Body Mass (kg)   | RNA-Seq | Lipoxygenase assay |
|-----------------|----------------|------------------|---------|--------------------|
| 6JK5            | 24             | 200.9            | x       | x                  |
| 9FL3            | 35             | 251.7            | x       |                    |
| 9ON6            | 21             | 192.8            | x       | x                  |
| 83H1            | 11             | 147.0            |         | x                  |
| Mean $\pm$ S.D. | 22.8 $\pm$ 9.9 | 198.1 $\pm$ 42.9 |         |                    |

119

120 Experimental trials. Serum was isolated from whole blood samples at baseline, 3 minutes, and 4  
121  $\frac{1}{2}$  - 5 minutes of breath-holding from fasted dolphins at Dolphin Quest, Oahu, in March 2018  
122 and May 2019. All trials were performed in the morning when the animals were fasted with at

123 least 12 hours having passed since the last meal on the previous day to minimize the potential  
124 confounding effect of nutritional state. To ensure that the samples were collected during resting  
125 behavior, each breath-hold was preceded by 2 minutes of rest or slow swimming at the surface.  
126 A trial was initiated when the dolphin rolled into dorsal recumbency with its blowhole  
127 submerged and continued for approximately 5 minutes. The breath-hold ended when the animal  
128 rolled into ventral recumbency and took a breath. Prior to this study the animals had previously  
129 participated in breath-hold experiments of durations up to 5 minutes (Fahlman et al., 2019a,  
130 2020b).

131 Blood collection and processing. Whole blood was collected from tail flukes at baseline (0-30  
132 seconds into the breath-hold) and during breath-holding for 3 minutes and 4 ½ (2018) or 5  
133 (2019) minutes while the animal was in dorsal recumbency with its blowhole submerged. Blood  
134 was collected into PAXgene tubes and RNA-Seq was performed subsequent to shipping, red  
135 blood cell lysis, RNA extraction (**Figure 2A**). All samples were shipped the same day via  
136 overnight courier to Duke University for downstream processing. For RNA extraction, tubes  
137 were equilibrated to room temperature for 2 hours to achieve complete lysis of blood cells.  
138 Subsequently, tubes were centrifuged at 4,000 x g for 10 minutes. Pellets were resuspended in 4  
139 mL of RNase-free water and RNA was extracted according to the PAXgene Blood RNA kit  
140 (PreAnalytiX #762164). Prior to library prep, RNA quality was evaluated on a Bioanalyzer 2100  
141 (Agilent). Stranded mRNA-seq libraries were prepared using the Nugen Universal Plus mRNA-  
142 seq Library preparation kit with Globin AnyDeplete (Tecan #9147-A01). Libraries were  
143 sequenced at 150bp paired-end on one lane of an Illumina NovaSeq 6000 instrument S-Prime  
144 flow cell. Library preparation and sequencing was performed in conjunction with the Duke  
145 University Sequencing and Genomic Technologies Shared Resource. Samples collected in 2018

146 were used to conduct RNA-Seq analysis and samples collected in 2019 were used for the  
147 lipoxygenase assays.

148 RNA-Seq data analysis. RNA-seq data were processed using the TrimGalore toolkit (Krueger,  
149 2020) which employs Cutadapt (Martin, 2011) to trim low-quality bases and Illumina sequencing  
150 adapters from the 3' end of the reads. Only reads that were 20nt or longer after trimming were  
151 kept for further analysis. Reads were mapped to the turTru1v92 version of the dolphin genome  
152 and transcriptome (Kersey et al., 2012) using the STAR RNA-seq alignment tool (Dobin et al.,  
153 2013). Reads were kept for subsequent analysis if they mapped to a single genomic location.

154 Gene counts were compiled using the HTSeq tool (Anders et al., 2015). Only genes that had at  
155 least 10 reads in any given library were used in subsequent analysis. Normalization and  
156 differential expression across the time points were carried out using the DESeq2 (Love et al.,  
157 2014) Bioconductor (Huber et al., 2015) package with the R statistical programming  
158 environment (R Core Team, 2020). The false discovery rate was calculated to control for  
159 multiple hypothesis testing. To identify relevant molecular features of dolphin breath-holding  
160 we first analyzed the RNA-Seq data from all individuals at baseline using gene set enrichment  
161 analysis (GSEA) (Mootha et al., 2003; Subramanian et al., 2005). GSEA is a standard pathway  
162 analysis tool that calculates enrichment scores for annotated pathways based on the rank order of  
163 genes present in the data for each pathway. Pathways with genes that are more up- or down-  
164 regulated are more likely to be enriched in a data set than pathways whose genes are randomly  
165 distributed throughout the data. Pathway enrichments in dolphin PBMCs at baseline, with genes  
166 ranked on total expression value, were compared with human whole blood pathway enrichments  
167 from the Genotype-Tissue Expression (GTEx) project.



168 Construction of gene regulatory networks. Gene expression networks were created using  
169 GeneMANIA (Franz et al., 2018), implemented within the Cytoscape platform (Shannon et al.,  
170 2003). For time-dependent gene network construction, all nodes with 0 or 1 connection were  
171 trimmed out of the networks. Two additional non-coding RNA genes were eliminated (RF00016  
172 RF00026). Pathway enrichments were performed in STRING using the trimmed network of 123  
173 genes. Human whole blood transcriptomics data used for the analyses described in this  
174 manuscript were obtained from the Genotype-Tissue Expression (GTEx) Program Portal  
175 (<https://gtexportal.org/home/>) accessed on 9/20/2020.

176 Lipoxygenase assays. Briefly, 5 ml of blood was collected directly into BD Vacutainer® SST™  
177 Tubes (SST) using a 21 g, 3/4 in. winged infusion set with a BD Vacutainer adapter and holder.  
178 Tubes were gently inverted 5 times to activate clotting reagent and allowed to clot at room  
179 temperature for 30 minutes in an upright position. Tubes were centrifuged at 1,500 x g for 15  
180 minutes to separate serum fractions, and serum was transferred to 15 ml conical tubes, frozen on  
181 dry ice, and shipped to Duke University for downstream analyses. Sera were stored at -80°C  
182 until use. Lipoxygenase activity was quantified from 1 µg of total protein using a Fluorometric  
183 Lipoxygenase Activity Assay Kit (BioVision Inc; cat. #K978).

184

## 185 **Results**

186 RNA-Seq from dolphins at baseline pinpoints enriched gene regulatory networks. All samples  
187 produced between 30 and 40 million reads, with no time-dependent changes in read counts  
188 across samples (**Supplementary Figure 1A**). Principle components analysis and hierarchical  
189 clustering of all samples (three individual dolphins x three time points) revealed both individual-  
190 and within-individual time-dependent grouping of the data (**Supplementary Figure 1B, C**).

191 GSEA identified multiple pathways enriched in dolphin PBMCs at baseline when ranked by total  
 192 expression, including hedgehog signaling and several pathways relevant to blood cell  
 193 metabolism, including heme metabolism, coagulation, IL6/JAK/STAT3 activation, apical  
 194 junctions, and allograft rejection (**Figure 2B, C**). GSEA also identified enrichment of pathways  
 195 related to apical junctions, interferon alpha response, estrogen response, complement activity,  
 196 and heme metabolism in RNA-Seq data from GTEx human whole blood transcriptomes (**Figure**

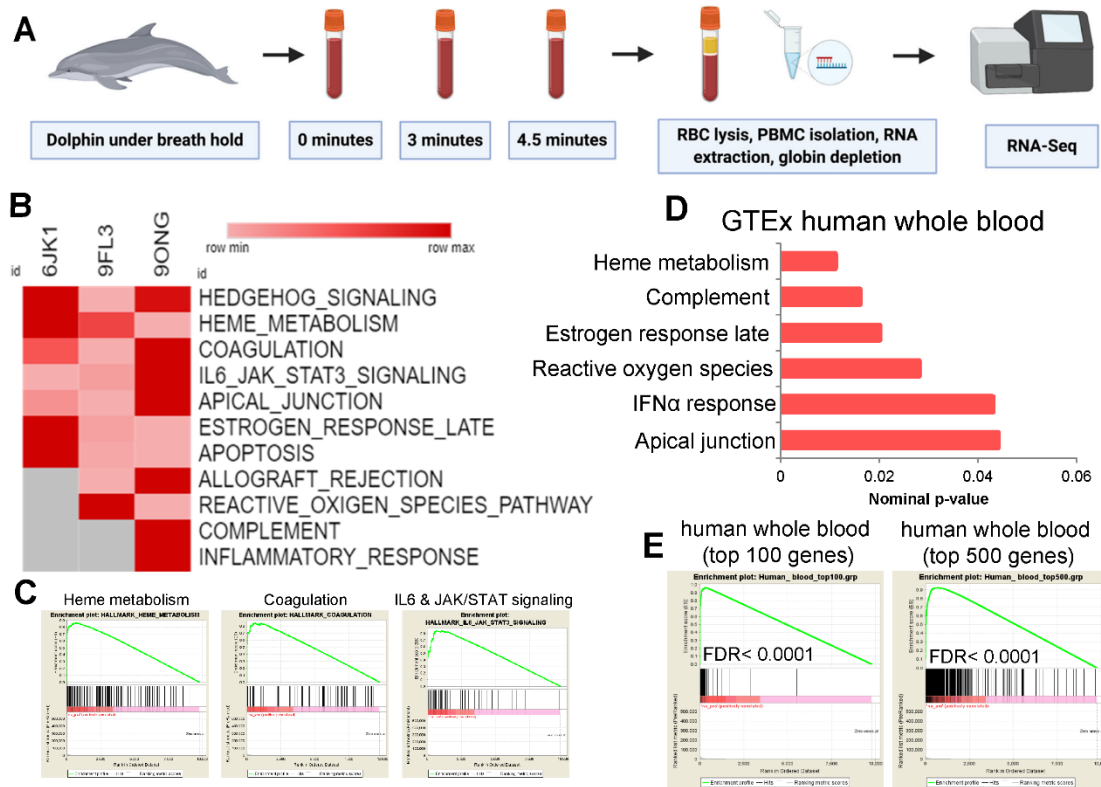

**Figure 2. RNA-Seq from dolphin peripheral blood mononuclear cells reveals enrichment of pathways similar to humans.** **A.** Whole blood from dolphins undergoing fasted breath-holds at baseline (0-30 seconds), 3 minutes, and 4 ½ minutes was collected from tail flukes and stored in PAXgene tubes for RNA extraction of peripheral blood mononuclear cells and RNA-Seq. **B.** Gene set enrichment analysis of baseline RNA-Seq data ranked by total expression pinpoints highly expressed relevant pathways. **C.** Enrichment plots for heme metabolism, coagulation, and IL6/JAK/STAT3 signaling from baseline dolphin RNA-Seq data. **D.** GSEA-based pathway enrichment from GTEx human whole blood RNA-Seq data ranked by total expression. **E.** GSEA enrichment plots comparing dolphin RNA-Seq data ranked by total expression with top 100 and top 500 expressed genes in human whole blood.

197 **2D)**. Comparison of dolphin baseline RNA-Seq data ranked by total expression with the top 100  
 198 and 500 most highly-expressed genes in human whole blood showed significant enrichment  
 199 (FDR<0.0001) (**Figure 2E**). Together these analyses suggest that significant overlap exists in  
 200 mRNA expression at both the gene-level and pathway-level between dolphin and human blood.  
 201 Breath-holding induces upregulation of multiple regulatory pathways. Next, we reasoned that  
 202 patterns of step-wise increases in mRNA expression may pinpoint molecular responses to breath-  
 203 holding common across individuals. We constructed gene regulatory networks for 136 genes

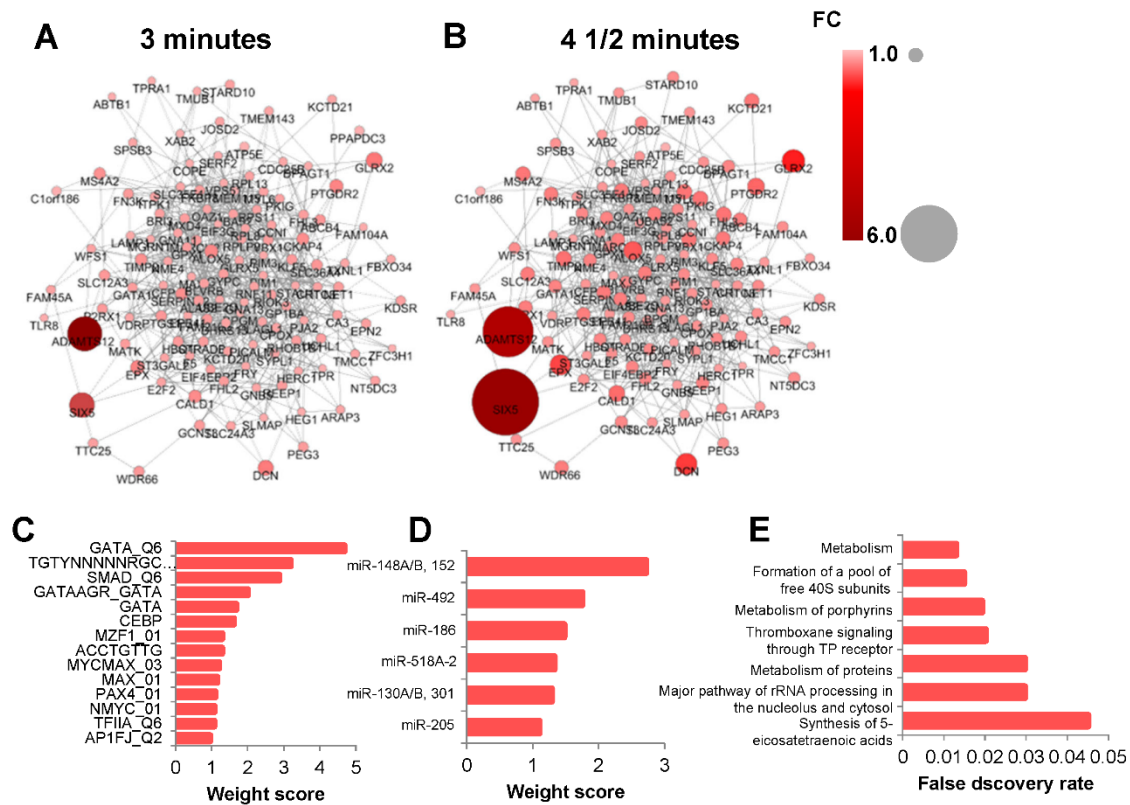

**Figure 3. Time-dependent upregulation of gene regulatory pathways during dolphin breath-holding.** **A.** Gene regulatory network formed by the time-dependent increases in mRNAs from baseline to 3 minutes (**A**) and 4 1/2 minutes (**B**). Fold changes for each gene over time are indicated by darker red and larger nodes. **C.** GeneMANIA-based transcription factor inference pinpoints GATA and SMAD transcription factor targets within the time-dependent network. **D.** MicroRNA enrichment inference based on the time-dependent network. **E.** Functional pathway enrichments for the time-dependent gene regulatory network.

204 with step-wise increases in mRNA expression from baseline to 3 minutes and again from 3  
205 minutes to 4 ½ minutes (**Figure 3A, B**). The gene regulatory network produced from these genes  
206 displayed enrichment in targets from several transcription factor families, including GATA and  
207 the small, mothers against decapentaplegic (SMAD) families (**Figure 3C**), both of which have  
208 been implicated in hematopoietic development and regulation (Blank and Karlsson, 2011;  
209 Lentjes et al., 2016). Network inference also pinpointed enrichment of targets of multiple  
210 microRNAs, including the miR148A/B/152 family, miR492, miR186, miR518A-2, the  
211 miR130A/B/301 family, and miR205 (**Figure 3D**). This network was also functionally enriched  
212 in several pathways, including the synthesis of 5-eicosatetraenoic acids, which is an initial step in  
213 the production of arachidonic acid by the 5-lipoxygenase, ALOX5 (**Figure 3E**).

214 Arachidonate 5-Lipoxygenase (ALOX5) and subsequent lipoxygenase activity enhanced in  
215 breath-holding dolphins. Consistent with these network-based inferences identifying the ALOX5  
216 pathway, ALOX5 was one of just two genes, along with IL5RA, that was significantly  
217 upregulated in all three individuals during breath-holding (**Figure 4A, B**). Lipoxygenase assays  
218 from serum of three individual dolphins collected in 2019 revealed time-dependent increases in  
219 lipoxygenase activity during breath-holding in all three individuals, consistent with the RNA-Seq  
220 analyses (**Figure 4C**). Comparison of the timing of these molecular changes with previously-  
221 published  $f_H$  measurements from the same dolphins demonstrated that changes in gene  
222 expression and enzymatic activity were likely coincident with bradycardia (**Figure 4D**).

223

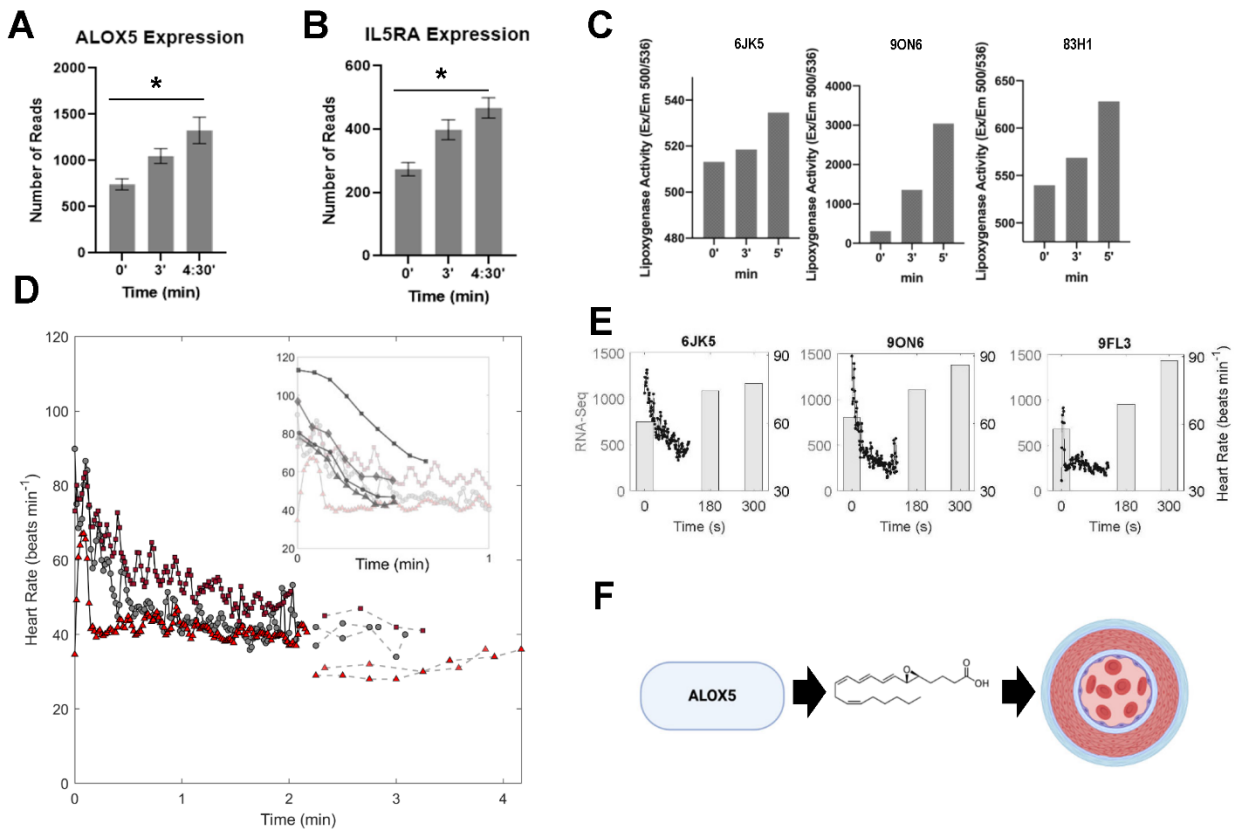

**Figure 4. Dolphins induce ALOX5 activity during breath-holding.** **A.** ALOX5 and **B.** IL5RA mRNA expression is significantly increased over time during breath-holding. **C.** Individual dolphin lipoygenase activity in whole blood collected at an independent sampling date. **D.** Physiological measurements of heart rate for three individual dolphins (black lines from ECG data previously published in Blawas et al., 2020, dashed lines from echocardiogram data previously published in Fahlman et al., 2020) over time. Inset shows heart rate for humans performing breath-holds with facial immersion in water (dark gray in inset) overlaid on dolphin heart rate. Human heart rate traces were digitally extracted from Arnold, 1985; Andersson et al., 2004; and Shattock and Tipton, 2012. **E.** Overlay of heart rate data with ALOX activity in three individual dolphins. **F.** Hypothesized mechanism through which ALOX5 improves dive performance and mitigates ischemic stress tolerance.

224

## 225 Discussion

226 Dolphins and other cetaceans have evolved exquisite physiological adaptations to deal with the  
 227 challenges of a fully aquatic lifestyle including having a hydrodynamic shape to reduce drag

228 (Fish, 1993), counter-current heat exchangers for thermoregulation (Pabst et al., 1999;  
229 Scholander and Schevill, 1955), and cardiorespiratory plasticity for exquisite management of  
230 circulation and respiratory gases (Blawas et al., 2021; Fahlman et al., 2020b, 2020a, 2019b;  
231 Noren et al., 2012). The well-known dive response, a suite of adaptations that support reduced  
232 aerobic metabolism during diving, involves apnea, bradycardia, and peripheral vasoconstriction  
233 that assures maintained mean arterial blood pressure as blood flow to peripheral tissues is  
234 reduced and allows regulation of perfusion to conserve oxygen-rich blood for the brain and heart.  
235 To maintain a constant mean arterial blood pressure and prevent hypertension, these adaptations  
236 must work in concert to ensure efficient autoregulation; however, extended dives also result in  
237 frequent events of ischemia and hypoxia (Fahlman et al., 2019a; McKnight et al., 2019; Ridgway  
238 et al., 1969). While these cardiorespiratory adaptations have been studied from the perspective of  
239 the changes in  $f_H$  associated with diving, we are not aware of any study that has measured blood  
240 pressure in voluntarily diving cetaceans. Thus, little is known about whether dolphins are able to  
241 maintain constant mean arterial blood pressure throughout the breath-hold. In addition,  
242 knowledge of the molecular adaptations that contribute to enhanced tolerance to hypoxia and  
243 ischemic stress, and that prevent reperfusion injury during and following a dive, is rudimentary  
244 at best. To address this lack of understanding, we combined an integrated genomics and systems-  
245 level analysis of breath-hold responses at the molecular level with existing physiological  
246 measurements to define the molecular responses to breath-holding in dolphins.

247       While this study is limited by a small sample size and relatively short breath-hold  
248 durations, our analyses identified candidate genes and pathways with time-dependent changes in  
249 expression throughout the breath-holds that were validated in functional studies using  
250 independently-collected samples and assays. Consequently, these results provide evidence for

251 fine-scale cardiovascular control in bottlenose dolphins at the genetic level and suggest that  
252 dolphins may manage blood pressure changes during diving using both autonomic and molecular  
253 pathways to regulate peripheral vasomotor control. Notably, these molecular changes occurred  
254 within the calculated aerobic dive limit (cADL) of bottlenose dolphins - the duration of a dive  
255 that can be sustained without requiring anaerobic respiration at the cellular level which has been  
256 estimated to be 6.5 minutes (Fahlman et al., 2018). This suggests that changes in gene  
257 expression may operate on a short enough time-scale that they could play a role in driving the  
258 physiological changes that are observed during the breath-hold. It is also worth considering the  
259 possibility that changes in gene expression could occur to support specific physiological  
260 responses to diving during a dive, and that this gene expression differs when the animal is at the  
261 surface. Future studies will be focused on using novel technologies, such as GRO-Seq (Lopes et  
262 al., 2017) and others to measure nascent mRNAs, as well as measuring later time points to  
263 understand the changes that occur upon recovery from breath-holds.

264 To provide physiological context for these molecular alterations on the time scales  
265 observed, we compared molecular changes to changes in previously published  $f_H$  patterns in the  
266 same individual dolphins during submerged breath-holds (Blawas et al., 2021; Fahlman et al.,  
267 2020b). If we assume that the appearance of vasoconstriction is coincident with bradycardia, our  
268 data provide evidence of an increase in the expression of a gene, ALOX5, known to promote  
269 vasoconstriction coincident with the onset of vasoconstriction. Vasoconstriction, or a narrowing  
270 of the blood vessels, has been suggested as a mechanism by which marine mammals during  
271 forced dives have been observed to optimize the use of onboard oxygen stores in the blood and  
272 muscle (Davis and Kanatous, 1999; Scholander and Grinnell, 1942; Zapol et al., 1979). Given  
273 the long assumed link between vasoconstriction and bradycardia in marine mammals, the rapid



274 bradycardia observed in these dolphins suggests that vasoconstriction was occurring in the  
275 dolphins in this study during breath-holds (Hochachka, 1981; Van Citters et al., 1965). We found  
276 that changes in gene expression occurred in all animals during the 5-minute breath-hold trials  
277 and that the same gene families that were upregulated in the dolphins during breath-holds help  
278 manage vasoconstriction in mice (Ichinose et al., 2001) and humans (Friedman et al., 1984).

279 Our integrated approach reveals possible molecular underpinnings that may support and  
280 act synergistically with the cardiac response to breath-holding in bottlenose dolphins.  
281 Specifically, we identified a suite of candidate genes that may support peripheral  
282 vasoconstriction and provide defense against ischemic and hypoxic stress in dolphins, including  
283 the GATA and SMAD transcription factors, several microRNAs, a disintegrin and  
284 metalloproteinase with thrombospondin motifs 12 (ADAMTS12), mitochondrial glutaredoxin-2  
285 (Glx2), and ALOX5. Interestingly, many of these factors play known roles in regulating  
286 hypoxia, hematopoiesis, and ischemic stress responses. For example, the GATA transcription  
287 factor family is an important modulator of hematopoietic development of T lymphocytes, mast  
288 cells, and erythrocytes (Lentjes et al., 2016). Likewise, the SMAD family regulates  
289 hematopoietic stem cells (Blank and Karlsson, 2011). Of the microRNAs identified from our  
290 analysis of target enrichments, nearly all have been shown to be protective against ischemia-  
291 induced cell death, including miR148A (Zheng et al., 2018), miR492 (Guo et al., 2020), miR186  
292 (Bostjancic et al., 2009; Li et al., 2013; Wang et al., 2018), miR130 (Lu et al., 2015), and  
293 miR205 (Chen et al., 2019). At the protein-coding gene level, ADAMTS12 genetic variation is  
294 associated with pediatric stroke (Witten et al., 2020), GLRX2 is implicated in neuroprotection  
295 during hypoxia and ischemia (Romero et al., 2015), and ALOX5 is known to be induced by  
296 hypoxia (Porter et al., 2014) and mediates the production of leukotrienes, which induce



297 bronchoconstriction and vasoconstriction (Poeckel and Funk, 2010). In addition, both ALOX5  
298 and IL5RA have been identified as susceptibility genes associated with asthma and asthmatic  
299 inflammation in humans (Cheong et al., 2005; Mougey et al., 2013), and a monoclonal antibody  
300 to the IL5RA ligand, IL5, is FDA-approved for the treatment of severe eosinophilic asthma  
301 (Fala, 2016; Pavord et al., 2012). Given the intricate connection between molecular control and  
302 physiologic function to manage ischemia, hypoxia, and inflammatory responses in humans and  
303 rodent models, (Bartels et al., 2013) it is intriguing to speculate as to how dolphins and other  
304 marine mammals may uncouple or leverage these interconnected processes for improved  
305 tolerance to ischemic/hypoxic stress without the pathological consequences associated with  
306 hyper-stimulation of these processes.

307         These results demonstrate that the ALOX5 pathway is upregulated in bottlenose dolphins  
308 during breath-holds and offer a potential mechanism for maintaining elevated peripheral  
309 resistance through vasoconstriction, which helps manage blood distribution and the available  
310 oxygen for critical organs. We suggest that the upregulation of ALOX5 could support a genetic  
311 response that is secondary to the autonomic response during diving to prolong vasoconstriction  
312 and maintain mean arterial blood pressure during extended periods of submersion (**Figure 4E**).  
313 The changes we observed occurred within the cADL of the species, indicating that fluctuations  
314 in gene expression could be occurring during regular dives. These fast-acting changes in gene  
315 expression that support vasoconstriction provide evidence for fine-scale control of perfusion in  
316 dolphins and an ability to maintain constant blood pressure, as is observed during forced dives of  
317 pinnipeds (Blix et al., 1976; Zapol et al., 1979). Additionally, the data show that during the  
318 breath-holds a large suite of candidate genes are upregulated that may support an increased  
319 tolerance to the hypoxia and ischemic conditions that are expected to arise in some peripheral

320 tissues during diving. By interpreting these molecular data in the context of the physiological  
321 changes known to occur in bottlenose dolphins during a breath-hold, we have identified several  
322 genes that are upregulated during apnea in dolphins and may be an additional mechanism to  
323 reinforce vasoconstriction while also providing defense against the hypoxia and ischemia  
324 resulting from this response.

325         These data connect the cellular and tissue-level responses of dolphins to apnea to  
326 understand whether the bottlenose dolphin may be genetically tuned to withstand hypoxia and  
327 the potential implications of this to translational medicine. Our results uncover potential  
328 candidate genes at the intersection of ischemia, hypoxia, and vasoconstriction that may  
329 contribute to the exquisite adaptation of dolphins and other marine mammals to life in the ocean.

330

### 331 **Abbreviations List**

332 cADL, calculated aerobic dive limit

333 ALOX5, Arachidonate 5-Lipoxygenase

334 GSEA, Gene Set Enrichment Analysis

335  $f_H$ , heart rate

336 IL5RA, Interleukin 5 receptor, alpha

337 PBMC, peripheral blood mononuclear cells

338

### 339 **Acknowledgments**

340 The authors wish to thank the marine mammal specialists, veterinarians, and dolphins at Dolphin  
341 Quest, Oahu, The Duke Sequencing and Genomics Technologies Shared Resource, and the Duke  
342 Genomics Analysis and Bioinformatics Shared Resource. This work was supported through

343 Dolphin Quest, Oahu (JAS) and the Triangle Comparative and Evolutionary Medicine Center  
344 (JAS). AMB was supported by a Bureau of Ocean Energy Management (BOEM) Environmental  
345 Study and the E. Bayard Halsted Scholarship in Science, History, and Journalism. The authors  
346 would like to thank Giselle Vargas and Mallissa Vuong for their role in data collection.

347

## 348 **References**

- 349 Allen, K.N., Vázquez-Medina, J.P., 2019. Natural Tolerance to Ischemia and Hypoxemia in  
350 Diving Mammals: A Review. *Front. Physiol.* 10.  
351 <https://doi.org/10.3389/fphys.2019.01199>
- 352 Anders, S., Pyl, P.T., Huber, W., 2015. HTSeq—a Python framework to work with high-  
353 throughput sequencing data. *Bioinformatics* 31, 166–169.  
354 <https://doi.org/10.1093/bioinformatics/btu638>
- 355 Bagchi, A., Batten, A.J., Levin, M., Allen, K.N., Fitzgerald, M.L., Hückstädt, L.A., Costa, D.P.,  
356 Buys, E.S., Hindle, A.G., 2018. Intrinsic anti-inflammatory properties in the serum of  
357 two species of deep-diving seal. *Journal of Experimental Biology* 221.  
358 <https://doi.org/10.1242/jeb.178491>
- 359 Bartels, K., Grenz, A., Eltzschig, H.K., 2013. Hypoxia and inflammation are two sides of the  
360 same coin. *Proc Natl Acad Sci U S A* 110, 18351–18352.  
361 <https://doi.org/10.1073/pnas.1318345110>
- 362 Bi, J., Hu, B., Zheng, J., Wang, J., Xiao, W., Wang, D., 2015. Characterization of the hypoxia-  
363 inducible factor 1 alpha gene in the sperm whale, beluga whale, and Yangtze finless  
364 porpoise. *Mar Biol* 162, 1201–1213. <https://doi.org/10.1007/s00227-015-2662-4>
- 365 Blank, U., Karlsson, S., 2011. The role of Smad signaling in hematopoiesis and translational  
366 hematology. *Leukemia* 25, 1379–1388. <https://doi.org/10.1038/leu.2011.95>
- 367 Blawas, A.M., Nowacek, D.P., Allen, A.S., Rocho-Levine, J., Fahlman, A., 2021. Respiratory  
368 sinus arrhythmia and submersion bradycardia in bottlenose dolphins (*Tursiops truncatus*).  
369 *Journal of Experimental Biology*. <https://doi.org/10.1242/jeb.234096>
- 370 Blix, A.S., Kjekshus, J.K., Enge, I., Bergan, A., 1976. Myocardial Blood Flow in the Diving  
371 Seal. *Acta Physiologica Scandinavica* 96, 277–280. <https://doi.org/10.1111/j.1748-1716.1976.tb10196.x>
- 372
- 373 Bona, E., Andersson, A.-L., Blomgren, K., Gilland, E., Puka-Sundvall, M., Gustafson, K.,  
374 Hagberg, H., 1999. Chemokine and Inflammatory Cell Response to Hypoxia-Ischemia in  
375 Immature Rats. *Pediatric Research* 45, 500–509. <https://doi.org/10.1203/00006450-199904010-00008>
- 376
- 377 Bostjancic, E., Zidar, N., Glavac, D., 2009. MicroRNA microarray expression profiling in human  
378 myocardial infarction. *Dis Markers* 27, 255–268. <https://doi.org/10.3233/DMA-2009-0671>
- 379
- 380 Breskovic, T., Uglesic, L., Zubin, P., Kuch, B., Kraljevic, J., Zanchi, J., Ljubkovic, M., Sieber,  
381 A., Dujic, Z., 2011. Cardiovascular changes during underwater static and dynamic

- 382 breath-hold dives in trained divers. *J Appl Physiol* (1985) 111, 673–678.  
383 <https://doi.org/10.1152/jappphysiol.00209.2011>
- 384 Chen, W., Ruan, Y., Zhao, S., Ning, J., Rao, T., Yu, W., Zhou, X., Liu, C., Qi, Y., Cheng, F.,  
385 2019. MicroRNA-205 inhibits the apoptosis of renal tubular epithelial cells via the  
386 PTEN/Akt pathway in renal ischemia-reperfusion injury. *Am J Transl Res* 11, 7364–  
387 7375.
- 388 Cheong, H.S., Kim, L.H., Park, B.L., Choi, Y.H., Park, H.-S., Hong, S.-J., Choi, B.W., Park, C.-  
389 S., Shin, H.D., 2005. Association analysis of interleukin 5 receptor alpha subunit  
390 (IL5RA) polymorphisms and asthma. *J Hum Genet* 50, 628–634.  
391 <https://doi.org/10.1007/s10038-005-0304-2>
- 392 Choi, D.W., 1996. Ischemia-induced neuronal apoptosis. *Current Opinion in Neurobiology* 6,  
393 667–672. [https://doi.org/10.1016/S0959-4388\(96\)80101-2](https://doi.org/10.1016/S0959-4388(96)80101-2)
- 394 Davis, R.W., Kanatous, S.B., 1999. Convective oxygen transport and tissue oxygen consumption  
395 in Weddell seals during aerobic dives. *Journal of Experimental Biology* 202, 1091–1113.
- 396 Dobin, A., Davis, C.A., Schlesinger, F., Drenkow, J., Zaleski, C., Jha, S., Batut, P., Chaisson,  
397 M., Gingeras, T.R., 2013. STAR: ultrafast universal RNA-seq aligner. *Bioinformatics* 29,  
398 15–21. <https://doi.org/10.1093/bioinformatics/bts635>
- 399 Eltzschig, H.K., Carmeliet, P., 2011. Hypoxia and Inflammation. *New England Journal of*  
400 *Medicine* 364, 656–665. <https://doi.org/10.1056/NEJMra0910283>
- 401 Fahlman, A., Brodsky, M., Miedler, S., Dennison, S., Ivančić, M., Levine, G., Rocho-Levine, J.,  
402 Manley, M., Rocabert, J., Borque-Espinosa, A., 2019a. Ventilation and gas exchange  
403 before and after voluntary static surface breath-holds in clinically healthy bottlenose  
404 dolphins, *Tursiops truncatus*. *Journal of Experimental Biology* 222.  
405 <https://doi.org/10.1242/jeb.192211>
- 406 Fahlman, A., Cozzi, B., Manley, M., Jabas, S., Malik, M., Blawas, A., Janik, V., 2020a.  
407 Conditioned variation in heart rate during static breath-holds in the bottlenose dolphin  
408 (*Tursiops truncatus*). *Front. Physiol.* 11. <https://doi.org/10.3389/fphys.2020.604018>
- 409 Fahlman, A., Hooker, S.K., Olszowka, A., Bostrom, B.L., Jones, D.R., 2009. Estimating the  
410 effect of lung collapse and pulmonary shunt on gas exchange during breath-hold diving:  
411 the Scholander and Kooyman legacy. *Respir Physiol Neurobiol* 165, 28–39.  
412 <https://doi.org/10.1016/j.resp.2008.09.013>
- 413 Fahlman, A., Jensen, F.H., Tyack, P.L., Wells, R.S., 2018. Modeling Tissue and Blood Gas  
414 Kinetics in Coastal and Offshore Common Bottlenose Dolphins, *Tursiops truncatus*.  
415 *Front. Physiol.* 9. <https://doi.org/10.3389/fphys.2018.00838>
- 416 Fahlman, A., Miedler, S., Marti-Bonmati, L., Fernandez, D.F., Caballero, P.M., Arenarez, J.,  
417 Rocho-Levine, J., Robeck, T., Blawas, A., 2020b. Cardiorespiratory coupling in  
418 cetaceans; a physiological strategy to improve gas exchange? *Journal of Experimental*  
419 *Biology*. <https://doi.org/10.1242/jeb.226365>
- 420 Fahlman, A., Miedler, S., Rocho-Levine, J., Jabois, A., Arenarez, J., Marti-Bonmati, L., García-  
421 Párraga, D., Cature, F., 2019b. Re-evaluating the significance of the dive response  
422 during voluntary surface apneas in the bottlenose dolphin, *Tursiops truncatus*. *Scientific*  
423 *Reports* 9. <https://doi.org/10.1038/s41598-019-45064-8>
- 424 Fala, L., 2016. Nucala (Mepolizumab): First IL-5 Antagonist Monoclonal Antibody FDA  
425 Approved for Maintenance Treatment of Patients with Severe Asthma. *Am Health Drug*  
426 *Benefits* 9, 106–110.

- 427 Fish, F.E., 1993. Power output and propulsive efficiency of swimming bottlenose dolphins  
428 (*Tursiops truncatus*). *J. Exp. Biol* 179–193.
- 429 Franz, M., Rodriguez, H., Lopes, C., Zuberi, K., Montojo, J., Bader, G.D., Morris, Q., 2018.  
430 GeneMANIA update 2018. *Nucleic Acids Res* 46, W60–W64.  
431 <https://doi.org/10.1093/nar/gky311>
- 432 Friedman, Z., Lunyong, V.E., Courtney, J., Smith, H., Berkowitz, P., Sun, F., 1984.  
433 Prostaglandin formation in the isolated human ductus arteriosus, aorta, pulmonary and  
434 umbilical arteries. *Prostaglandins Leukot Med* 14, 279–286.  
435 [https://doi.org/10.1016/0262-1746\(84\)90211-7](https://doi.org/10.1016/0262-1746(84)90211-7)
- 436 Gooden, B.A., 1994. Mechanism of the human diving response. *Integr Physiol Behav Sci* 29, 6–  
437 16. <https://doi.org/10.1007/BF02691277>
- 438 Gottlieb, R.A., Engler, R.L., 1999. Apoptosis in Myocardial Ischemia-Reperfusion. *Annals of*  
439 *the New York Academy of Sciences* 874, 412–426. [https://doi.org/10.1111/j.1749-](https://doi.org/10.1111/j.1749-6632.1999.tb09255.x)  
440 [6632.1999.tb09255.x](https://doi.org/10.1111/j.1749-6632.1999.tb09255.x)
- 441 Guo, L.-L., Chen, H.-H., Qu, F.-C., Lu, Q.-H., 2020. Clinical significance of miR-492 in  
442 peripheral blood of acute myocardial infarction. *Eur Rev Med Pharmacol Sci* 24, 9041–  
443 9045. [https://doi.org/10.26355/eurrev\\_202009\\_22849](https://doi.org/10.26355/eurrev_202009_22849)
- 444 Hindle, A.G., 2020. Diving deep: Understanding the genetic components of hypoxia tolerance in  
445 marine mammals. *Journal of Applied Physiology*.  
446 <https://doi.org/10.1152/jappphysiol.00846.2019>
- 447 Hochachka, P.W., 1981. Brain, Lung, and Heart Functions during Diving and Recovery. *Science*  
448 212, 509–514.
- 449 Huber, W., Carey, V.J., Gentleman, R., Anders, S., Carlson, M., Carvalho, B.S., Bravo, H.C.,  
450 Davis, S., Gatto, L., Girke, T., Gottardo, R., Hahne, F., Hansen, K.D., Irizarry, R.A.,  
451 Lawrence, M., Love, M.I., MacDonald, J., Obenchain, V., Oleś, A.K., Pagès, H., Reyes,  
452 A., Shannon, P., Smyth, G.K., Tenenbaum, D., Waldron, L., Morgan, M., 2015.  
453 Orchestrating high-throughput genomic analysis with Bioconductor. *Nat Methods* 12,  
454 115–121. <https://doi.org/10.1038/nmeth.3252>
- 455 Ichinose, F., Zapol, W.M., Sapirstein, A., Ullrich, R., Tager, A.M., Coggins, K., Jones, R.,  
456 Bloch, K.D., 2001. Attenuation of hypoxic pulmonary vasoconstriction by endotoxemia  
457 requires 5-lipoxygenase in mice. *Circ Res* 88, 832–838.  
458 <https://doi.org/10.1161/hh0801.089177>
- 459 Irving, L., Scholander, P.F., Grinnell, S.W., 1941. The respiration of the porpoise, *tursiops*  
460 *truncatus*. *Journal of Cellular and Comparative Physiology* 17, 145–168.  
461 <https://doi.org/10.1002/jcp.1030170203>
- 462 Johnson, P., Elsner, R., Zenteno-Savín, T., 2005. Hypoxia-inducible factor 1 proteomics and  
463 diving adaptations in ringed seal. *Free Radical Biology and Medicine* 39, 205–212.  
464 <https://doi.org/10.1016/j.freeradbiomed.2005.03.008>
- 465 Johnson, P., Elsner, R., Zenteno-Savín, T., 2004. Hypoxia-Inducible Factor in Ringed Seal  
466 (*Phoca hispida*) Tissues. *Free Radical Research* 38, 847–854.  
467 <https://doi.org/10.1080/10715760410001725526>
- 468 Kersey, P.J., Staines, D.M., Lawson, D., Kulesha, E., Derwent, P., Humphrey, J.C., Hughes,  
469 D.S.T., Keenan, S., Kerhornou, A., Koscielny, G., Langridge, N., McDowall, M.D.,  
470 Megy, K., Maheswari, U., Nuhn, M., Paulini, M., Pedro, H., Toneva, I., Wilson, D.,  
471 Yates, A., Birney, E., 2012. Ensembl Genomes: an integrative resource for genome-scale

- 472 data from non-vertebrate species. *Nucleic Acids Res.* 40, D91-97.  
473 <https://doi.org/10.1093/nar/gkr895>
- 474 Kooyman, G.L., Ponganis, P.J., 1998. The physiological basis of diving to depth: birds and  
475 mammals. *Annu. Rev. Physiol.* 60, 19–32.  
476 <https://doi.org/10.1146/annurev.physiol.60.1.19>
- 477 Krueger, F., 2020. FelixKrueger/TrimGalore.
- 478 Lentjes, M.H.F.M., Niessen, H.E.C., Akiyama, Y., de Bruïne, A.P., Melotte, V., van Engeland,  
479 M., 2016. The emerging role of GATA transcription factors in development and disease.  
480 *Expert Rev Mol Med* 18, e3. <https://doi.org/10.1017/erm.2016.2>
- 481 Li, C., Fang, Z., Jiang, T., Zhang, Q., Liu, C., Zhang, C., Xiang, Y., 2013. Serum microRNAs  
482 profile from genome-wide serves as a fingerprint for diagnosis of acute myocardial  
483 infarction and angina pectoris. *BMC Med Genomics* 6, 16. <https://doi.org/10.1186/1755-8794-6-16>
- 485 Lopes, R., Agami, R., Korkmaz, G., 2017. GRO-seq, A Tool for Identification of Transcripts  
486 Regulating Gene Expression. *Methods Mol Biol* 1543, 45–55.  
487 [https://doi.org/10.1007/978-1-4939-6716-2\\_3](https://doi.org/10.1007/978-1-4939-6716-2_3)
- 488 Love, M.I., Huber, W., Anders, S., 2014. Moderated estimation of fold change and dispersion for  
489 RNA-seq data with DESeq2. *Genome Biology* 15, 550. <https://doi.org/10.1186/s13059-014-0550-8>
- 491 Lu, C., Wang, X., Ha, T., Hu, Y., Liu, L., Zhang, X., Yu, H., Miao, J., Kao, R., Kalbfleisch, J.,  
492 Williams, D., Li, C., 2015. Attenuation of cardiac dysfunction and remodeling of  
493 myocardial infarction by microRNA-130a are mediated by suppression of PTEN and  
494 activation of PI3K dependent signaling. *J Mol Cell Cardiol* 89, 87–97.  
495 <https://doi.org/10.1016/j.yjmcc.2015.10.011>
- 496 Martin, M., 2011. Cutadapt removes adapter sequences from high-throughput sequencing reads.  
497 *EMBnet.journal* 17, 10–12. <https://doi.org/10.14806/ej.17.1.200>
- 498 McKnight, J.C., Bennett, K.A., Bronkhorst, M., Russell, D.J.F., Balfour, S., Milne, R., Bivins,  
499 M., Moss, S.E.W., Colier, W., Hall, A.J., Thompson, D., 2019. Shining new light on  
500 mammalian diving physiology using wearable near-infrared spectroscopy. *PLOS Biology*  
501 17, e3000306. <https://doi.org/10.1371/journal.pbio.3000306>
- 502 Mirceta, S., Signore, A.V., Burns, J.M., Cossins, A.R., Campbell, K.L., Berenbrink, M., 2013.  
503 Evolution of Mammalian Diving Capacity Traced by Myoglobin Net Surface Charge.  
504 *Science* 340, 1234192–1234192. <https://doi.org/10.1126/science.1234192>
- 505 Mootha, V.K., Lindgren, C.M., Eriksson, K.-F., Subramanian, A., Sihag, S., Lehar, J.,  
506 Puigserver, P., Carlsson, E., Ridderstråle, M., Laurila, E., Houstis, N., Daly, M.J.,  
507 Patterson, N., Mesirov, J.P., Golub, T.R., Tamayo, P., Spiegelman, B., Lander, E.S.,  
508 Hirschhorn, J.N., Altshuler, D., Groop, L.C., 2003. PGC-1alpha-responsive genes  
509 involved in oxidative phosphorylation are coordinately downregulated in human diabetes.  
510 *Nat. Genet.* 34, 267–273. <https://doi.org/10.1038/ng1180>
- 511 Mougey, E., Lang, J.E., Allayee, H., Teague, W.G., Dozor, A.J., Wise, R.A., Lima, J.J., 2013.  
512 ALOX5 polymorphism associates with increased leukotriene production and reduced  
513 lung function and asthma control in children with poorly controlled asthma. *Clin Exp*  
514 *Allergy* 43, 512–520. <https://doi.org/10.1111/cea.12076>
- 515 Murdoch, C., Muthana, M., Lewis, C.E., 2005. Hypoxia Regulates Macrophage Functions in  
516 Inflammation. *The Journal of Immunology* 175, 6257–6263.  
517 <https://doi.org/10.4049/jimmunol.175.10.6257>



- 518 Nery, M.F., Arroyo, J.I., Opazo, J.C., 2013. Accelerated evolutionary rate of the myoglobin gene  
519 in long-diving whales. *J. Mol. Evol.* 76, 380–387. <https://doi.org/10.1007/s00239-013->  
520 9572-1
- 521 Noren, S.R., Kendall, T., Cuccurullo, V., Williams, T.M., 2012. The dive response redefined:  
522 underwater behavior influences cardiac variability in freely diving dolphins. *Journal of*  
523 *Experimental Biology* 215, 2735–2741. <https://doi.org/10.1242/jeb.069583>
- 524 Nowbar, A.N., Gitto, M., Howard, J.P., Francis, D.P., Al-Lamee, R., 2019. Mortality From  
525 Ischemic Heart Disease. *Circulation: Cardiovascular Quality and Outcomes* 12, e005375.  
526 <https://doi.org/10.1161/CIRCOUTCOMES.118.005375>
- 527 Pabst, D.A., Rommel, S.A., McLellan, W.A., 1999. Functional anatomy of marine mammals, in:  
528 *Biology of Marine Mammals*.
- 529 Panneton, M.W., 2013. The Mammalian Diving Response: An Enigmatic Reflex to Preserve  
530 Life? *Physiology* 28, 284–297. <https://doi.org/10.1152/physiol.00020.2013>
- 531 Pavord, I.D., Korn, S., Howarth, P., Bleecker, E.R., Buhl, R., Keene, O.N., Ortega, H., Chanez,  
532 P., 2012. Mepolizumab for severe eosinophilic asthma (DREAM): a multicentre, double-  
533 blind, placebo-controlled trial. *Lancet* 380, 651–659. <https://doi.org/10.1016/S0140->  
534 6736(12)60988-X
- 535 Poeckel, D., Funk, C.D., 2010. The 5-lipoxygenase/leukotriene pathway in preclinical models of  
536 cardiovascular disease. *Cardiovasc Res* 86, 243–253. <https://doi.org/10.1093/cvr/cvq016>
- 537 Porter, K.M., Kang, B.-Y., Adesina, S.E., Murphy, T.C., Hart, C.M., Sutliff, R.L., 2014. Chronic  
538 hypoxia promotes pulmonary artery endothelial cell proliferation through H<sub>2</sub>O<sub>2</sub>-induced  
539 5-lipoxygenase. *PLoS One* 9, e98532. <https://doi.org/10.1371/journal.pone.0098532>
- 540 R Core Team, 2020. R: A Language and Environment for Statistical Computing. R Foundation  
541 for Statistical Computing, Vienna, Austria.
- 542 Ridgway, S.H., Scronce, B.L., Kanwisher, J., 1969. Respiration and Deep Diving in the  
543 Bottlenose Porpoise. *Science* 166, 1651–1654.
- 544 Romero, J.I., Hanschmann, E.-M., Gellert, M., Eitner, S., Holubiec, M.I., Blanco-Calvo, E.,  
545 Lillig, C.H., Capani, F., 2015. Thioredoxin 1 and glutaredoxin 2 contribute to maintain  
546 the phenotype and integrity of neurons following perinatal asphyxia. *Biochim Biophys*  
547 *Acta* 1850, 1274–1285. <https://doi.org/10.1016/j.bbagen.2015.02.015>
- 548 Scholander, P.F., 1940. Experimental Investigations on the Respiratory Function in Diving  
549 Mammals and Birds. *Hvalradets Skrifter*.
- 550 Scholander, P.F., Grinnell, S.W., 1942. Aerobic and anaerobic changes in seal muscles during  
551 diving 11.
- 552 Scholander, P.F., Schevill, W.E., 1955. Counter-Current Vascular Heat Exchange in the Fins of  
553 Whales. *Journal of Applied Physiology* 8, 279–282.  
554 <https://doi.org/10.1152/jappl.1955.8.3.279>
- 555 Shannon, P., Markiel, A., Ozier, O., Baliga, N.S., Wang, J.T., Ramage, D., Amin, N.,  
556 Schwikowski, B., Ideker, T., 2003. Cytoscape: a software environment for integrated  
557 models of biomolecular interaction networks. *Genome Res* 13, 2498–2504.  
558 <https://doi.org/10.1101/gr.1239303>
- 559 Subramanian, A., Tamayo, P., Mootha, V.K., Mukherjee, S., Ebert, B.L., Gillette, M.A.,  
560 Paulovich, A., Pomeroy, S.L., Golub, T.R., Lander, E.S., Mesirov, J.P., 2005. Gene set  
561 enrichment analysis: a knowledge-based approach for interpreting genome-wide  
562 expression profiles. *Proc Natl Acad Sci U S A* 102, 15545–15550.  
563 <https://doi.org/10.1073/pnas.0506580102>

- 564 Taboni, A., Fagoni, N., Moia, C., Vinetti, G., Ferretti, G., 2019. Gas exchange and  
565 cardiovascular responses during breath-holding in divers. *Respir Physiol Neurobiol* 267,  
566 27–34. <https://doi.org/10.1016/j.resp.2019.06.002>
- 567 Tian, R., Wang, Z., Niu, X., Zhou, K., Xu, S., Yang, G., 2016. Evolutionary Genetics of Hypoxia  
568 Tolerance in Cetaceans during Diving. *Genome Biol Evol* 8, 827–839.  
569 <https://doi.org/10.1093/gbe/evw037>
- 570 Tian, R., Yin, D., Liu, Y., Seim, I., Xu, S., Yang, G., 2017. Adaptive Evolution of Energy  
571 Metabolism-Related Genes in Hypoxia-Tolerant Mammals. *Front. Genet.* 8.  
572 <https://doi.org/10.3389/fgene.2017.00205>
- 573 Tift, M.S., Ponganis, P.J., Crocker, D.E., 2014. Elevated carboxyhemoglobin in a marine  
574 mammal, the northern elephant seal. *Journal of Experimental Biology* 217, 1752–1757.  
575 <https://doi.org/10.1242/jeb.100677>
- 576 Van Citters, R.L., Franklin, D.L., Smith, O.A., Watson, N.W., Elsner, R.W., 1965.  
577 Cardiovascular adaptations to diving in the northern elephant seal *Mirounga*  
578 *angustirostris*. *Comparative Biochemistry and Physiology* 16, 267–276.  
579 [https://doi.org/10.1016/0010-406X\(65\)90324-5](https://doi.org/10.1016/0010-406X(65)90324-5)
- 580 Wang, R., Bao, H., Zhang, S., Li, R., Chen, L., Zhu, Y., 2018. miR-186-5p Promotes Apoptosis  
581 by Targeting IGF-1 in SH-SY5Y OGD/R Model. *Int J Biol Sci* 14, 1791–1799.  
582 <https://doi.org/10.7150/ijbs.25352>
- 583 Witten, A., Rühle, F., de Witt, M., Barysenka, A., Stach, M., Junker, R., Nowak-Göttl, U., Stoll,  
584 M., 2020. ADAMTS12, a new candidate gene for pediatric stroke. *PLoS One* 15,  
585 e0237928. <https://doi.org/10.1371/journal.pone.0237928>
- 586 World Health Organization, 2018. Global Health Estimates 2016: Deaths by Cause, Age, Sex, by  
587 Country and by Region, 2000- 2016. Geneva.
- 588 Yim, H.-S., Cho, Y.S., Guang, X., Kang, S.G., Jeong, J.-Y., Cha, S.-S., Oh, H.-M., Lee, Jae-Hak,  
589 Yang, E.C., Kwon, K.K., Kim, Y.J., Kim, T.W., Kim, W., Jeon, J.H., Kim, S.-J., Choi,  
590 D.H., Jho, S., Kim, H.-M., Ko, J., Kim, H., Shin, Y.-A., Jung, H.-J., Zheng, Y., Wang, Z.,  
591 Chen, Y., Chen, M., Jiang, A., Li, E., Zhang, S., Hou, H., Kim, T.H., Yu, L., Liu, S.,  
592 Ahn, K., Cooper, J., Park, S.-G., Hong, C.P., Jin, W., Kim, H.-S., Park, C., Lee, K.,  
593 Chun, S., Morin, P.A., O'Brien, S.J., Lee, H., Kimura, J., Moon, D.Y., Manica, A.,  
594 Edwards, J., Kim, B.C., Kim, S., Wang, J., Bhak, J., Lee, H.S., Lee, Jung-Hyun, 2014.  
595 Minke whale genome and aquatic adaptation in cetaceans. *Nature Genetics* 46, 88–92.  
596 <https://doi.org/10.1038/ng.2835>
- 597 Zapol, W.M., Liggins, G.C., Schneider, R.C., Qvist, J., Snider, M.T., Creasy, R.K., Hochachka,  
598 P.W., 1979. Regional blood flow during simulated diving in the conscious Weddell seal.  
599 *Journal of Applied Physiology* 47, 968–973. <https://doi.org/10.1152/jappl.1979.47.5.968>
- 600 Zheng, D., Li, Z., Wei, X., Liu, R., Shen, A., He, D., Tang, C., Wu, Z., 2018. Role of miR-148a  
601 in Mitigating Hepatic Ischemia-Reperfusion Injury by Repressing the TLR4 Signaling  
602 Pathway via Targeting CaMKII $\alpha$  in Vivo and in Vitro. *Cell Physiol Biochem* 49, 2060–  
603 2072. <https://doi.org/10.1159/000493716>
- 604 Zhou, X., Sun, D., Guang, X., Ma, S., Fang, X., Mariotti, M., Nielsen, R., Gladyshev, V.N.,  
605 Yang, G., 2018. Molecular Footprints of Aquatic Adaptation Including Bone Mass  
606 Changes in Cetaceans. *Genome Biol Evol* 10, 967–975.  
607 <https://doi.org/10.1093/gbe/evy062>



608 Zhu, K., Ge, D., Wen, Z., Xia, L., Yang, Q., 2018. Evolutionary Genetics of Hypoxia and Cold  
609 Tolerance in Mammals. *J Mol Evol* 86, 618–634. <https://doi.org/10.1007/s00239-018->  
610 9870-8  
611

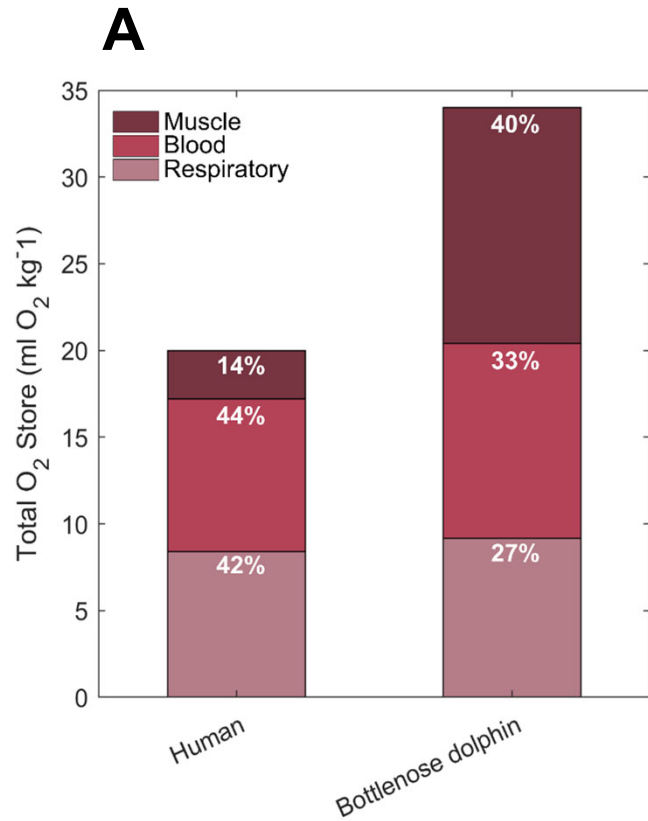

**B**

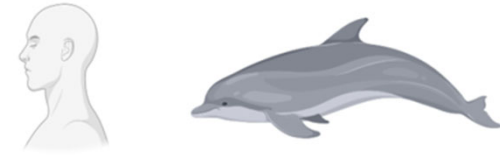

|                             |          |     |
|-----------------------------|----------|-----|
| Average dive duration (min) | 0.5-0.67 | 0.6 |
| Max dive duration (min)     | 11.6     | 13  |
| cADL (min)                  | —        | 6.5 |

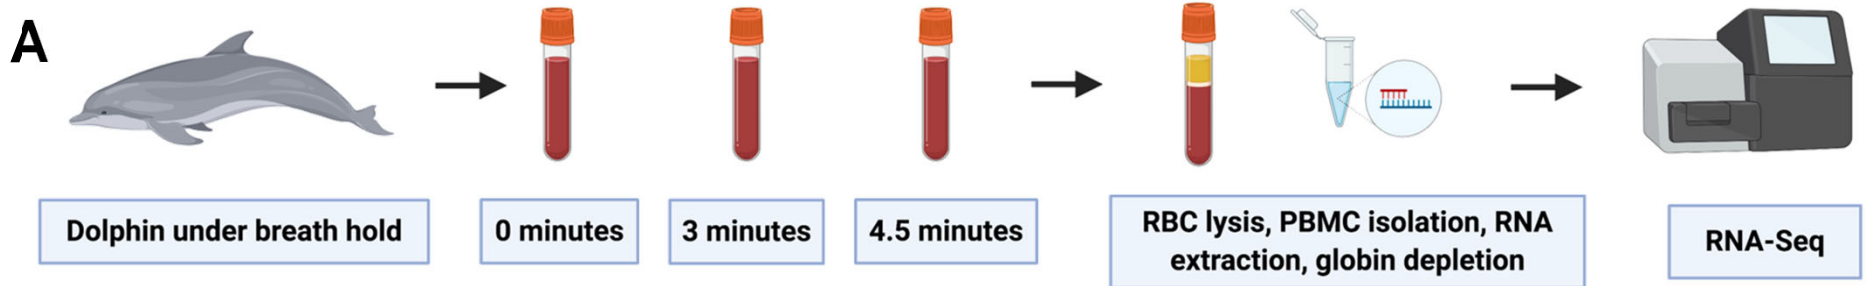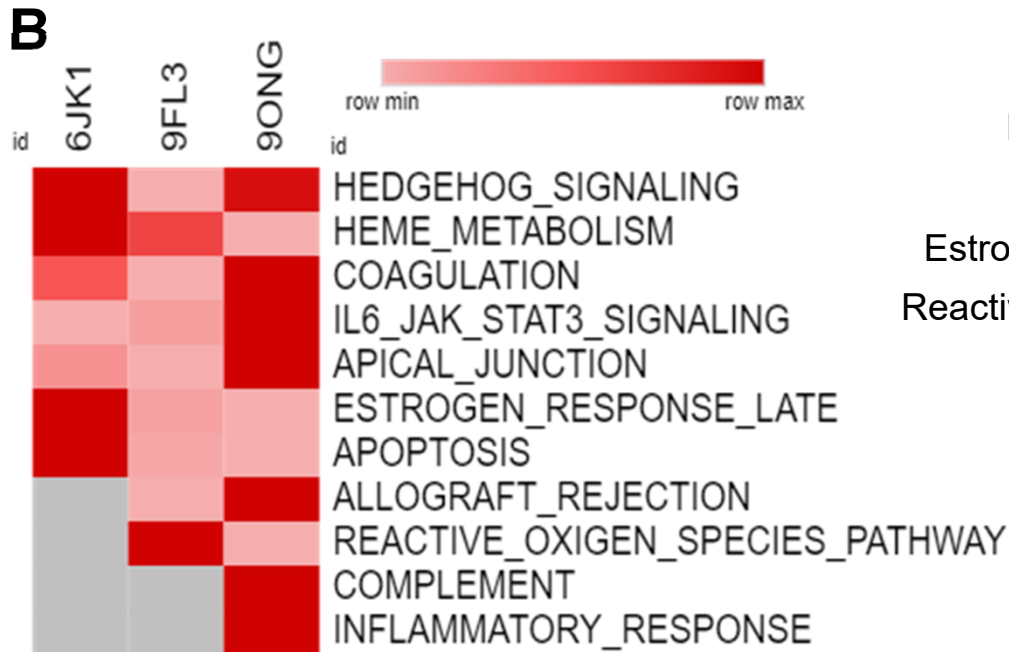

**D** GTEx human whole blood

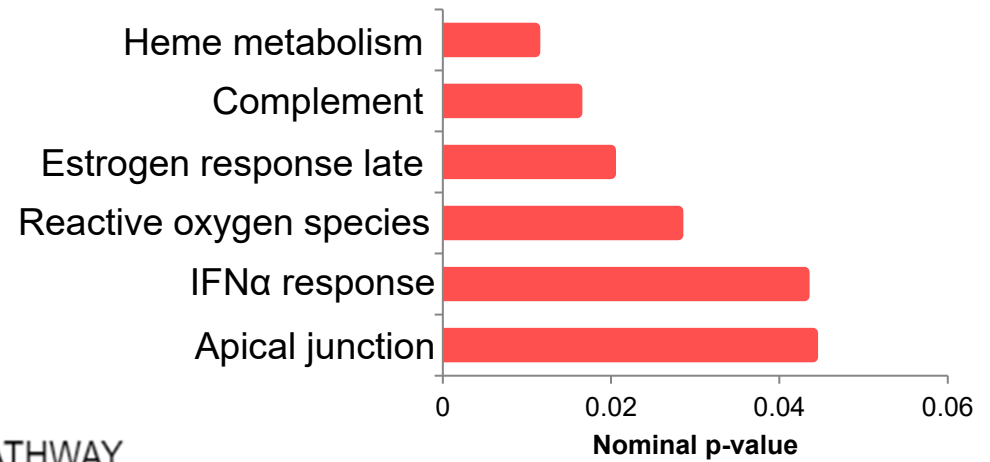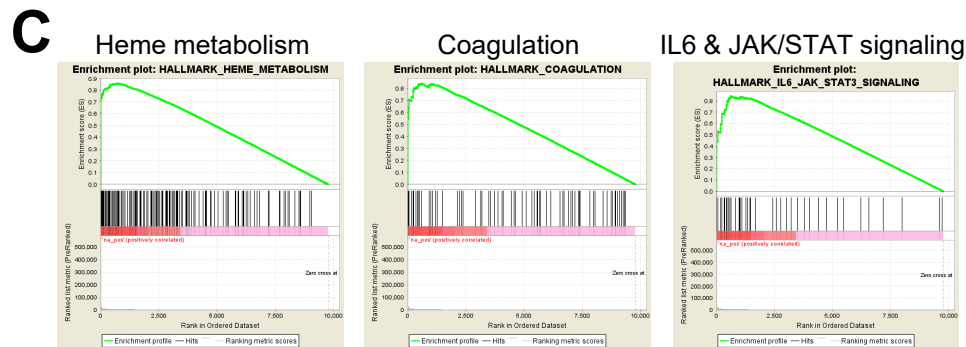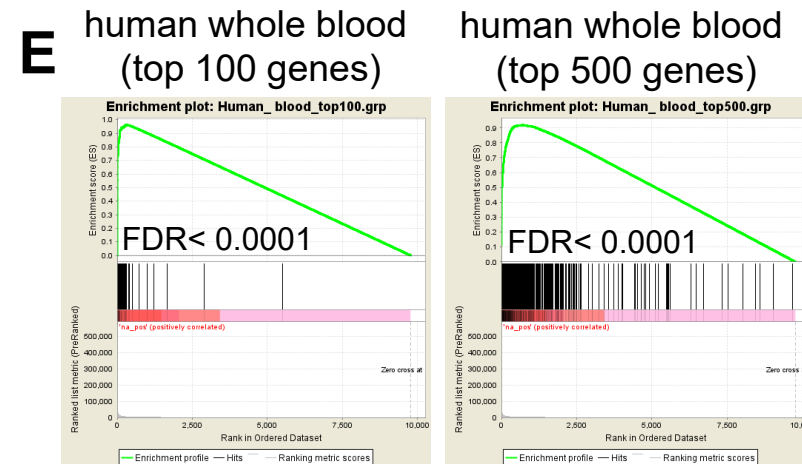

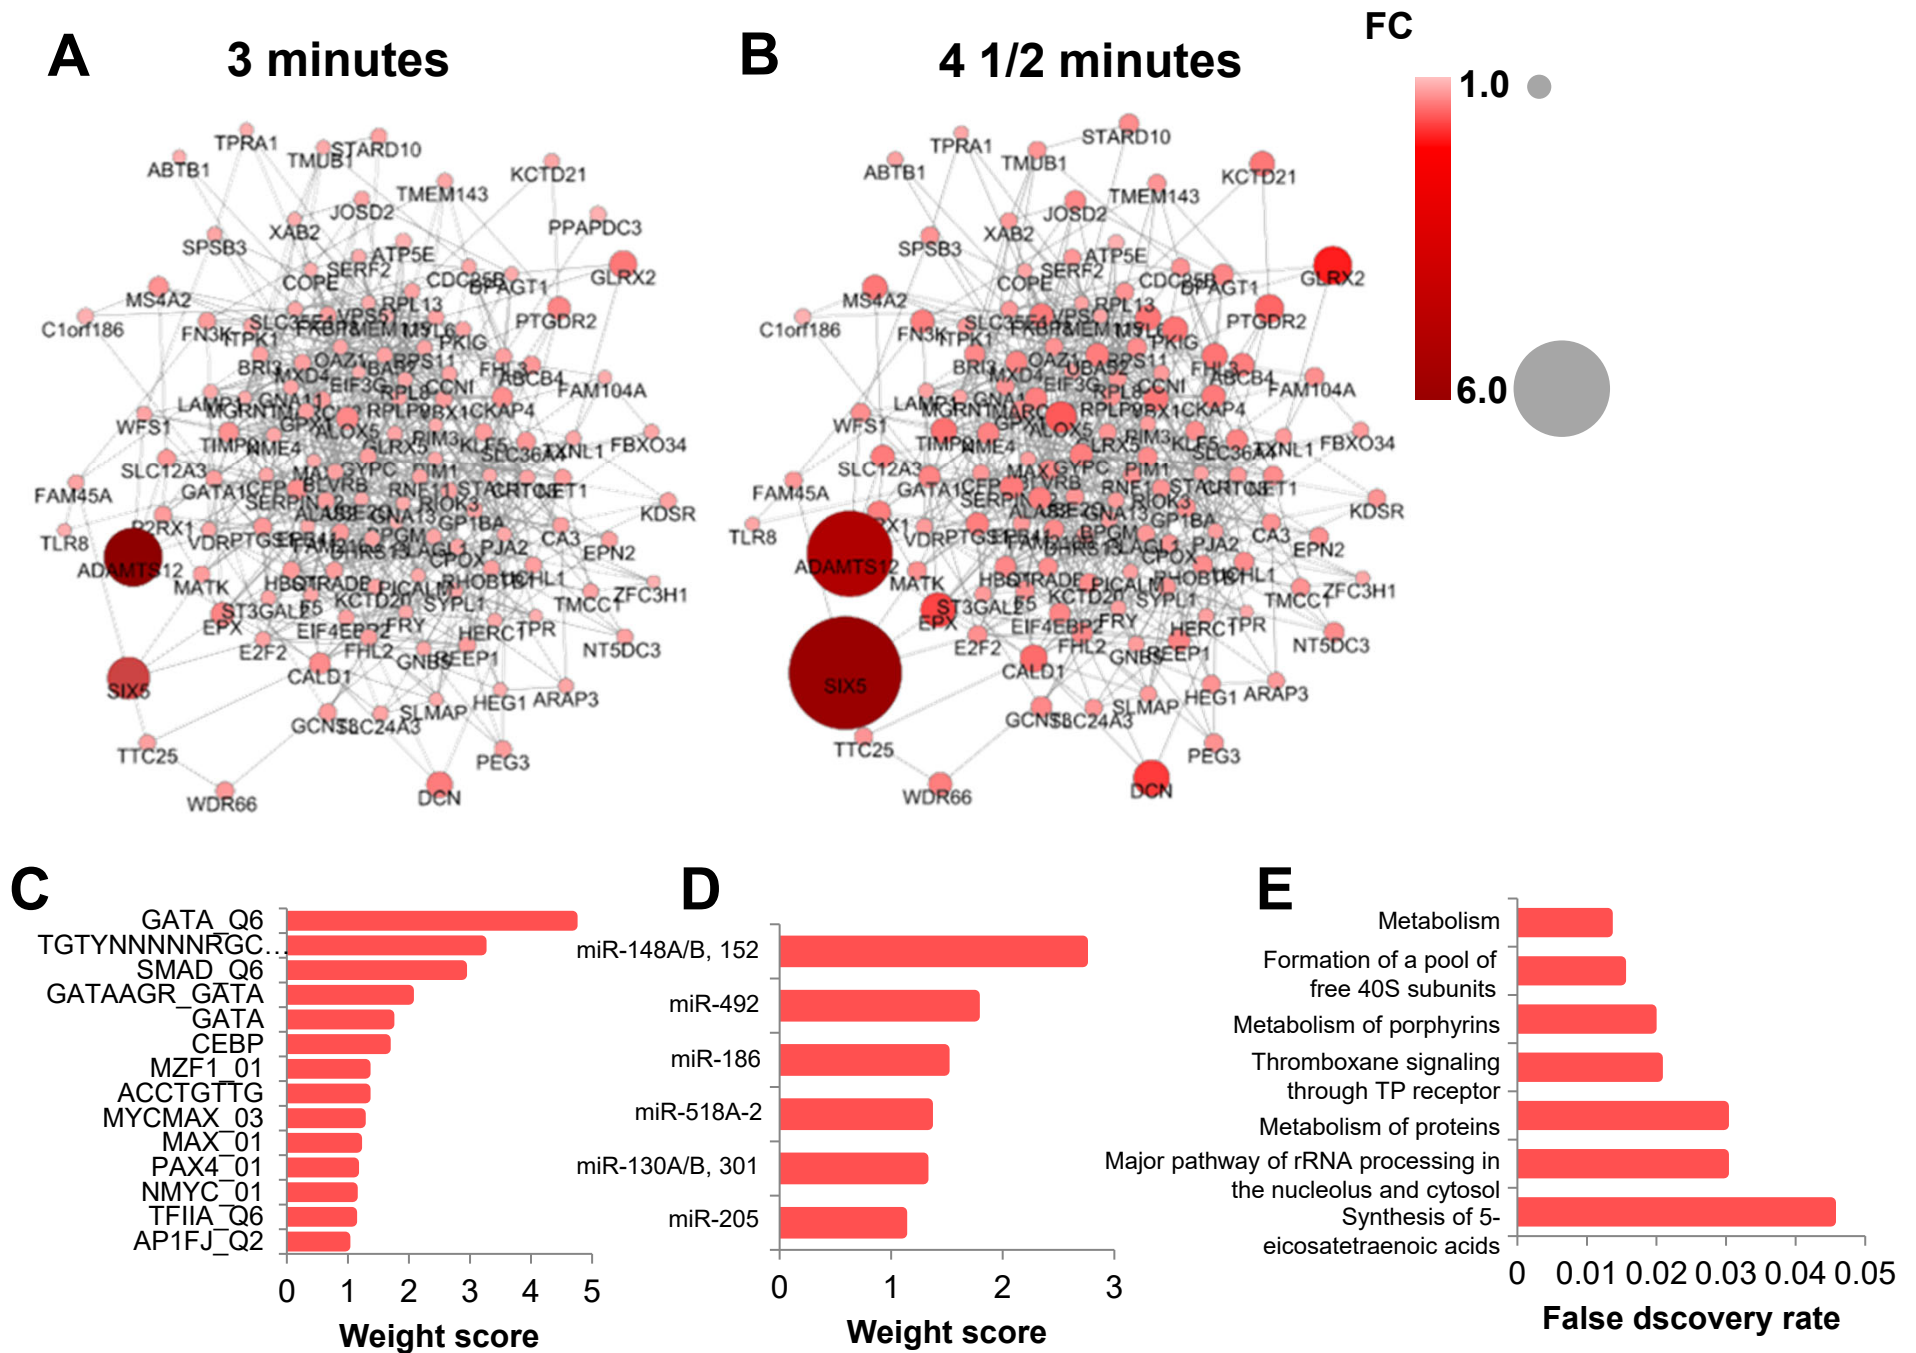

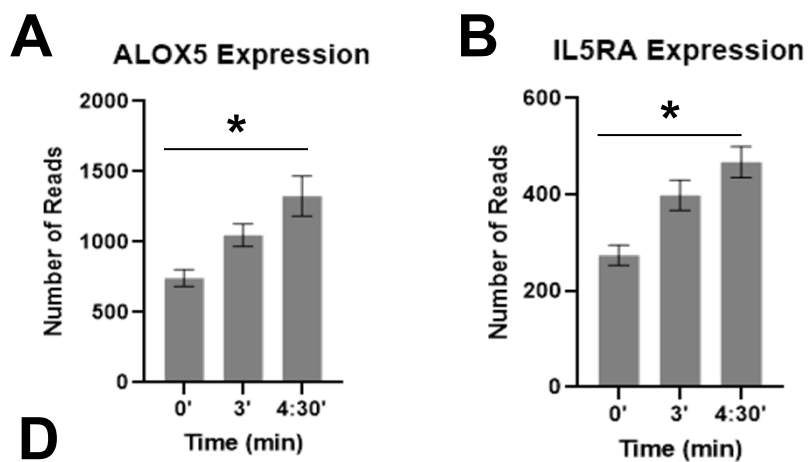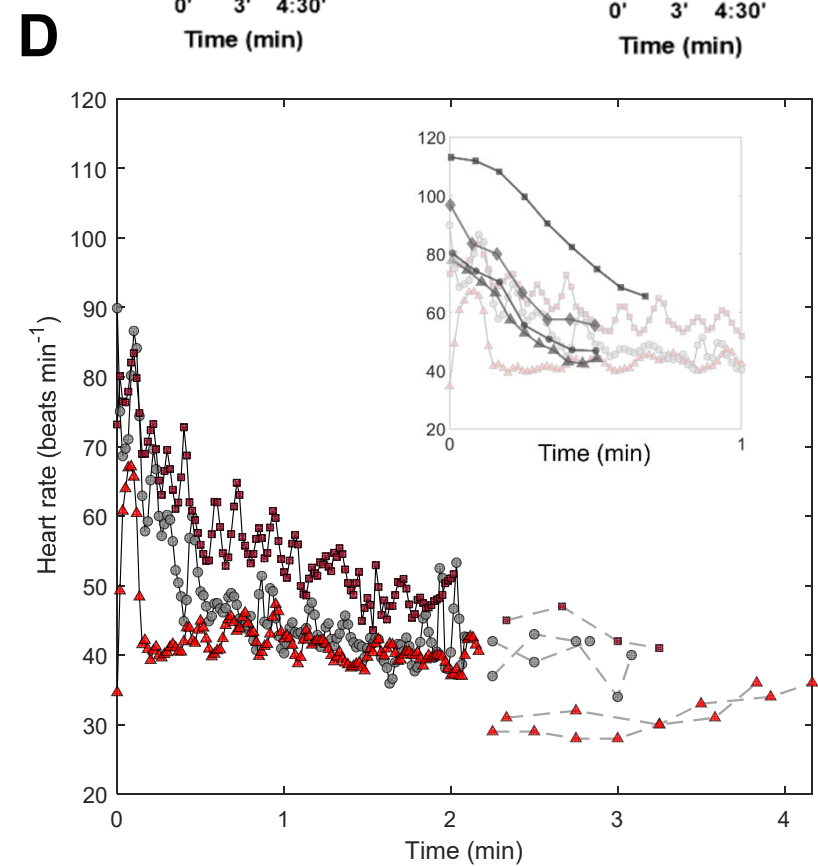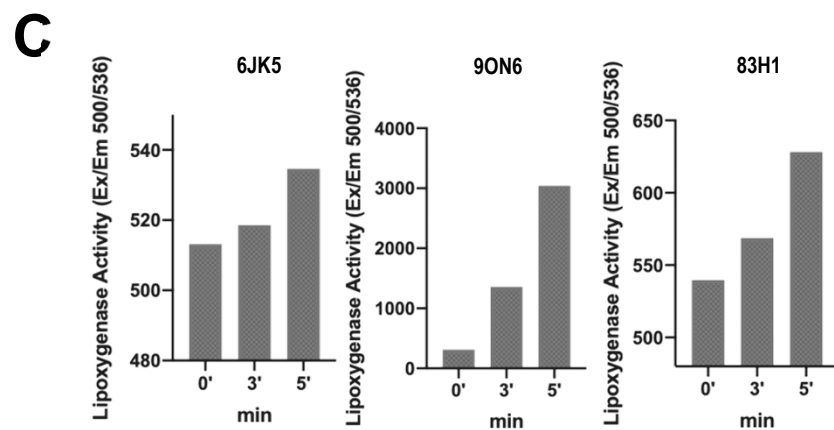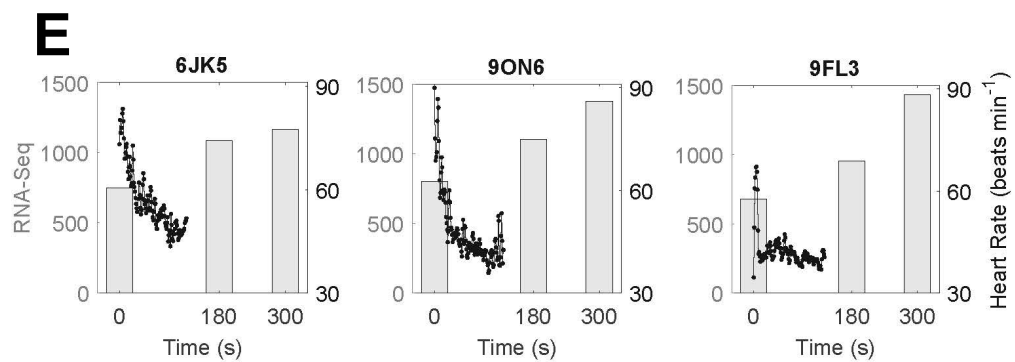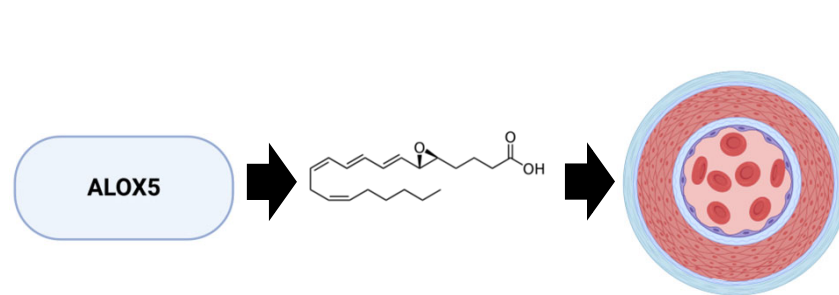

| <b>Animal ID</b> | <b>Age (years)</b> | <b>Body Mass (kg)</b> | <b>RNA-Seq</b> | <b>Lipoxygenase assay</b> |
|------------------|--------------------|-----------------------|----------------|---------------------------|
| 6JK5             | 24                 | 200.9                 | x              | x                         |
| 9FL3             | 35                 | 251.7                 | x              |                           |
| 9ON6             | 21                 | 192.8                 | x              | x                         |
| 83H1             | 11                 | 147.0                 |                | x                         |
| Mean±S.D.        | 22.8±9.9           | 198.1±42.9            |                |                           |
